# Supplementary material for: Msx genes define a population of mural cell precursors required for head blood vessel maturation
Source: Oxford University Press journal article supplement (doi:10.1242/dev.063214), 2011-06-21
Supplement: dev063214tables1.pdf [file dev063214tables1.pdf]

**Table S1. Genotyping primers (5' to 3')**

| Allele                                      | Forward primer                  | Forward primer 2                 | Reverse primer                   |
|---------------------------------------------|---------------------------------|----------------------------------|----------------------------------|
| <i>Msx1<sup>lacZ</sup></i>                  | TTCTCCAGCTCGCTCAGCCTCACCGAGACC  | GACCGCCAAGAGGAAAAAGAGAGGCCGAAGGC | GACCGCCAAGAGGAAAAAGAGAGGCCGAAGGC |
| <i>Msx2<sup>lox</sup>Msx2<sup>GFP</sup></i> | GTCTTCGCTTGAGAGTTGCCAGCCGAGTCGC | GTCGGACATGAGCGCCTCACGCTGAAGG     | TTCCGCTGCCTGCAAAGGGTCGCTACAGACG  |
| <i>Sm22<sup>Cre</sup></i>                   | GGACATGTTCAAGGATCGCCAGGCG       | –                                | GCATAACCAGTGAAACAGCATTGCTG       |
| <i>Msx2<sup>lacZ</sup></i>                  | GGCAAAGCGCCATTCGCCATTCAGGC      | GTCTTCGCTTGAGAGTTGCCA            | GTCGGACATGAGCGCCTC               |
| <i>Rosa<sup>mTimG</sup></i>                 | AAAGTCGCTCTCTGAGTTGTAT          | GCGAAGAGTTTGCCTCAACC             | GGAGCGGGAGAAATGGATATG            |
| <i>Msx1<sup>CreERT2</sup></i>               | GGCTGTCTCGAGCTGCGGCTGGAGGG      | CCATGGCGGTTGCGGTGGCCGAGC         | GCTGGATAGTTTTACTGCCAGACCGCGCGCC  |
