# Supplementary material for: Msx genes define a population of mural cell precursors required for head blood vessel maturation
Source: Oxford University Press journal article supplement (doi:10.1242/dev.063214), 2011-06-21
Supplement: dev063214tables2.pdf [file dev063214tables2.pdf]

Table S2. qRT-PCR primers (5' to 3')

| Gene          | Forward primer          | Reverse primer            |
|---------------|-------------------------|---------------------------|
| <i>Jag1</i>   | TGCTCACACCTGAAAGACCACT  | ATGGGGACCACAGACGTTAGAA    |
| <i>VE-cad</i> | CTGCTTTTGC GGAACGGAA    | GTGGTTTGGTTTGGGCTGGAAT    |
| <i>Cd31</i>   | CTGGTGCTCTATGCAAGCCTC   | CGGTGCTGAGACCTGCTTT       |
| <i>Vwf</i>    | CTTCTGTACGCCTCAGCTATG   | GCGGTTGTAATCCACACAAG      |
| <i>Sma</i>    | GTCCCAGACATCAGGGAGTAA   | TGGGATACTTCAGCGTCA GGA    |
| <i>Myocd</i>  | GATGGGCTCTCCAGATCAG     | GGCTGCATCATTCTTGTCACTT    |
| <i>Myh11</i>  | ACGACAACCTCTCTCGCTTT    | GCCTGTCGAATAGCCCTAGA      |
| <i>Pdgfrb</i> | GGAGTCGAGTTGGAAAGCTCAT  | AGGTTCCGAGATCTGGAACA      |
| <i>Vegfa</i>  | TGTAACGATGAAGCCCTGGAGT  | ATGTGCTGGCTTTGGTGAGGTT    |
| <i>Tgfb1</i>  | TACGCTGAGTGGCTGTCTTTT   | ACAAGAGCAGTGAGCGCTGAAT    |
| <i>Angpt1</i> | CGGGAAGATGGAAGCCTGGATTT | TCCATCAGCTCAATCCTCAGCA    |
| <i>Klf2</i>   | ACACCAAGAGCTCGCACCTAAA  | GCATCCTCCAGTTGCAATGA      |
| <i>Mmp2</i>   | GTGGCAGTGTCATCCTCAAGA   | AGGGTCATAGTCGAAGTGGCAT    |
| <i>Mmp9</i>   | ACCTTCAAAGGCCTCAAGTG    | GAAGGCGTCATCGATCATGT      |
| <i>Bmpr1a</i> | GGTTGTGCTCATTTCATGGCT   | TTGTAACGACCCCTGCTTGAGA    |
| <i>Bmpr1b</i> | AGCTGGTCCGAGAGACTGAGATA | GGGAGCCGTTTTTCATGATAGTCTG |
| <i>Bmpr2</i>  | TTTGCTGCCCCAGGGATGACTT  | TGCACACAGCCGTCTTGATT      |
| <i>Bmp2</i>   | TGCGCAGCTTCCATCACGAAGA  | ACTCGTCACTGGGGACAGAACTTA  |
| <i>Bmp4</i>   | AGGAAGAGCAGAGCCAGGGAA   | TGCTGAGGTTGAAGAGGAAACG    |
| <i>Bmp6</i>   | GGACATGGTCATGAGCTTTGTG  | ACCCTCAGGAATCTGGGATAGGTT  |
| <i>Bmp8</i>   | CTCCAAGACGCCAAGAACCAAGA | GGAAGCTGACGTACAGCTCATGTT  |
| <i>Msx1</i>   | AAGATGCTCTGGTGAAGCCGAAA | CTTGCGGTTGGTCTTGTGCTT     |
| <i>Msx2</i>   | ATACAGGAGCCCGGCAGATACT  | AACTTGCGCTCCAAGGCTAGAA    |
| <i>Gapdh</i>  | GGCAAAGTGGAGATTGTTGC    | AATTTGCCGTGAGTGGAGTC      |
